# Supplementary material for: Balancing Positive and Negative Selection: In Vivo Evolution of Candida lusitaniae MRR1
Source: PubMed Central journal article supplement (PMC8092287; doi:10.1128/mbio.03328-20), 2021-03-30

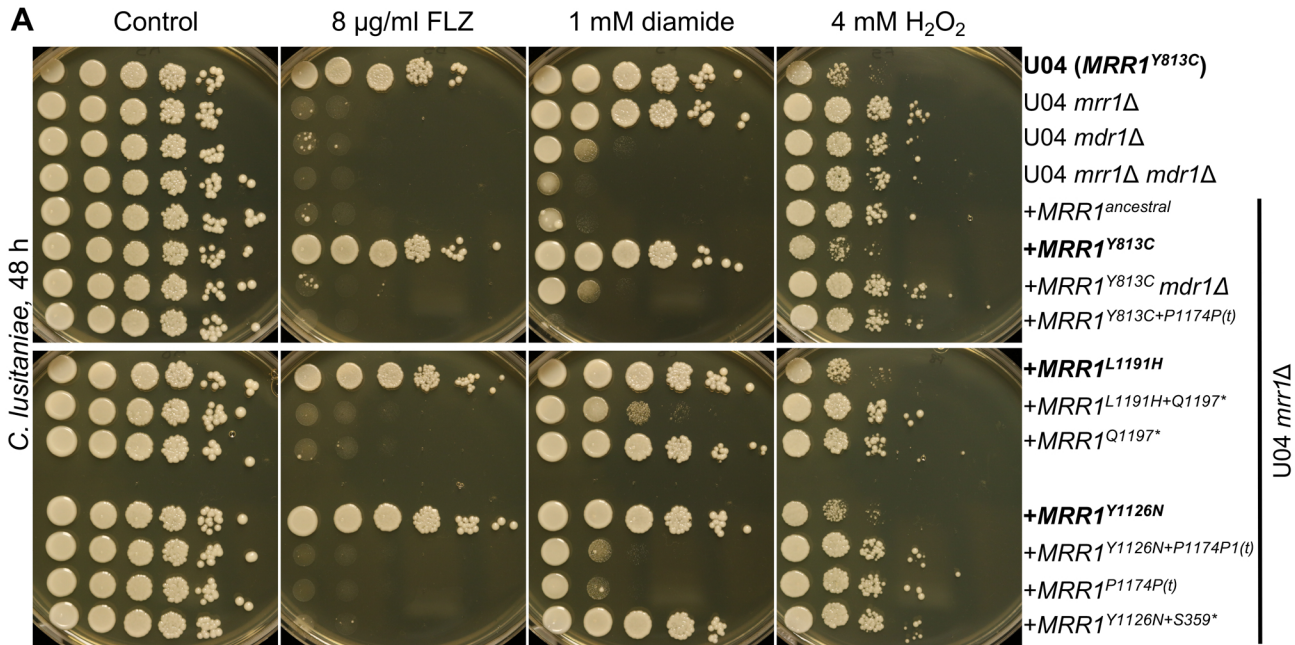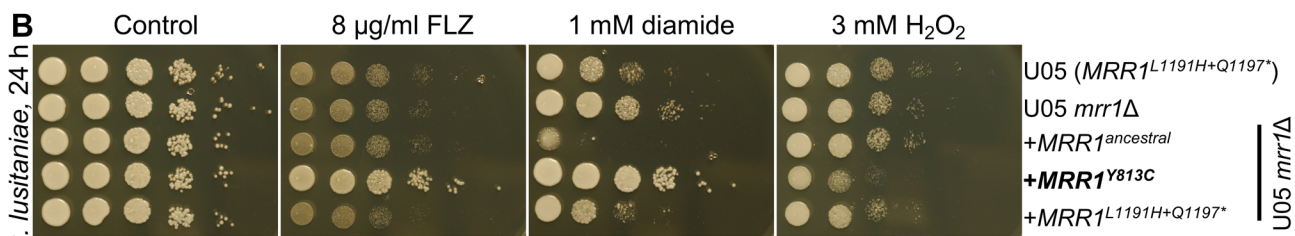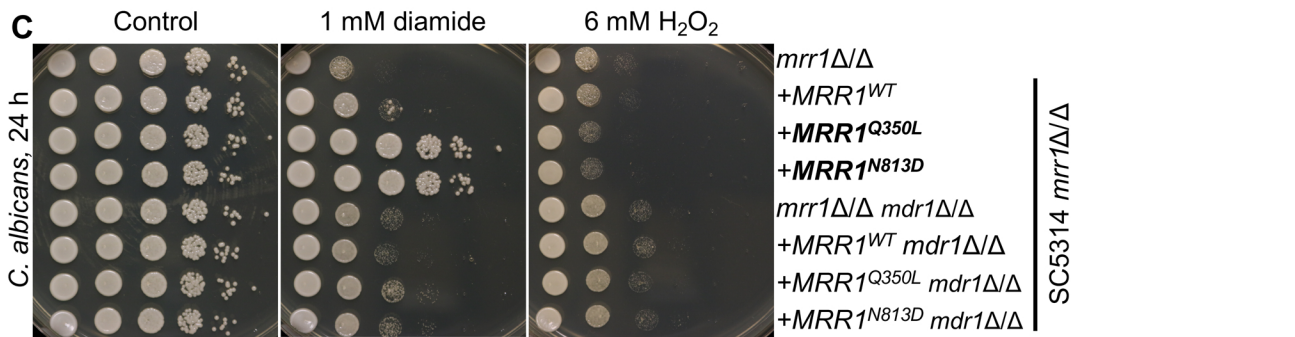

Supplement: mBio.03328-20-sf004.pdf [file mBio.03328-20-sf004.pdf]
